# Supplementary material for: Preoperative prediction of p16 expression in cervical cancer by amide proton transfer imaging combined with diffusion kurtosis imaging: a retrospective study
Source: PeerJ. 2025 Apr 30;13:e19387. doi: 10.7717/peerj.19387 (PMC12049096; doi:10.7717/peerj.19387)
Supplement: Supplemental Information 1 — The datasets of APT and DKI derivative parameters. These results were used for statistical analysis to explore the correlation of APT/DKI parameter characteristics of preoperative MR functional sequences and the histochemical expression of p16 in cervical cancer. [file peerj-13-19387-s001.xls]

## Sheet: Sheet1
Patient Number	APT	APT1	APT2	MK	MK1	MK2	MD	MD1	MD2	P16(negative-0, positive-1)
1	2.8	2.78	2.82	0.75	0.71	0.79	0.00112	0.00102	0.00122	0
2	2.5	2.49	2.51	0.68	0.61	0.75	0.00146	0.00147	0.00145	0
3	2.86	2.85	2.87	0.8	0.75	0.85	0.00096	0.00086	0.00106	0
4	3.2	3.12	3.28	0.95	0.9	1	0.00112	0.00101	0.00123	1
5	3.7	3.6	3.8	0.99	0.9	1.08	0.00069	0.00061	0.00077	1
6	2.7	2.65	2.75	0.8	0.7	0.9	0.00085	0.00074	0.00096	0
7	2.7	2.71	2.69	0.79	0.79	0.79	0.00106	0.00103	0.00109	0
8	3.1	3.05	3.15	1.01	1.01	0.01	0.00085	0.00071	0.00099	1
9	2.4	2.37	2.43	0.79	0.75	0.83	0.00102	0.00113	0.00091	0
10	2.7	2.72	2.68	0.74	0.7	0.78	0.00118	0.00106	0.0013	0
11	2.9	2.93	2.87	0.83	0.66	1	0.00087	0.00085	0.00089	0
12	3.2	2.87	3.53	1.05	1	1.1	0.00087	0.0007	0.00104	1
13	3.1	3.1	3.1	1.1	1	1.2	0.00092	0.00103	0.00081	1
14	2.9	2.8	3	0.91	0.99	0.83	0.00097	0.00103	0.00091	1
15	3	3.03	2.97	0.99	0.88	1.1	0.00098	0.00086	0.0011	1
16	3.2	3.15	3.25	1.02	1.09	0.95	0.00088	0.00087	0.00089	0
17	3.3	3.13	3.47	1.19	1.01	1.37	0.00077	0.00074	0.0008	1
18	3.4	3.23	3.57	0.99	0.87	1.11	0.00093	0.00086	0.001	1
19	3.4	3.62	3.18	0.96	0.9	1.02	0.00089	0.00098	0.0008	1
20	2.5	2.53	2.47	0.83	0.82	0.84	0.00091	0.00097	0.00085	1
21	2.5	2.48	2.52	0.74	0.66	0.82	0.00126	0.00118	0.00134	0
22	3.2	3.06	3.34	0.99	0.89	1.09	0.00092	0.00099	0.00085	1
23	3.7	3.68	3.72	1.36	1.36	1.36	0.00084	0.00081	0.00087	1
24	3.2	3.03	3.37	1.27	1.23	1.31	0.00069	0.00061	0.00077	0
25	2.8	2.88	2.72	0.66	0.64	0.68	0.00089	0.00098	0.0008	0
26	3	2.99	3.01	0.99	1.03	0.95	0.00111	0.00089	0.00123	1
27	3.4	3.36	3.44	1.05	1.06	1.04	0.00088	0.00081	0.00095	1
28	3	3	3	0.77	0.66	0.88	0.00113	0.00106	0.0012	0
29	3.6	3.78	3.42	0.89	0.8	0.98	0.00079	0.00085	0.00073	1
30	3.3	3.26	3.34	1.01	0.89	1.13	0.00091	0.00098	0.00084	1
31	3.2	2.9	3.5	1.06	1.03	1.09	0.00094	0.00081	0.00107	1
32	3.7	3.98	3.42	0.88	0.9	0.86	0.00077	0.00075	0.00079	1
33	2.8	2.6	3	0.75	0.78	0.72	0.0011	0.00115	0.00105	0
34	3	2.95	3.05	0.96	0.89	1.03	0.00095	0.00107	0.00083	1
35	3.1	2.95	3.25	1.31	1.23	1.39	0.00073	0.00068	0.00078	1
36	3.7	3.59	3.81	1.19	1.18	1.2	0.00079	0.00071	0.00087	1
37	3	3	3	0.99	0.89	1.09	0.00089	0.0008	0.00098	1
38	2.9	2.91	2.89	0.99	0.89	1.08	0.00123	0.00116	0.0013	0
39	2.7	2.68	2.72	1	1.15	0.85	0.00071	0.0007	0.00072	1
40	2.8	2.8	2.8	0.78	0.74	0.82	0.00123	0.00121	0.00125	1
41	3.2	3.02	3.38	0.88	0.88	0.88	0.00109	0.00101	0.00117	0
42	2.8	2.8	2.8	1.08	1.02	1.14	0.00081	0.00076	0.00086	1
43	3.3	3.28	3.32	1.42	1.41	1.43	0.00058	0.0005	0.00066	1
44	3.1	3.12	3.08	0.91	0.85	0.97	0.00097	0.00102	0.00092	1
45	3.2	3.35	3.05	0.81	0.92	0.7	0.00101	0.00103	0.00099	1
46	3.4	3.44	3.36	0.9	0.95	0.85	0.00084	0.0008	0.00088	1
47	3.2	3.02	3.38	0.71	0.7	0.72	0.00142	0.00139	0.00145	0
48	2.7	2.6	2.8	0.56	0.55	0.57	0.00112	0.00112	0.00112	1
49	2.75	2.71	2.79	1.38	1.3	1.46	0.00062	0.00058	0.00066	1
50	2.9	2.78	3.02	1.15	0.99	1.31	0.00115	0.00111	0.00119	0
51	3.3	3.4	3.2	1.03	0.91	1.15	0.00085	0.00081	0.00089	1
52	3.1	3	3.2	1.22	1.17	1.27	0.0009	0.00085	0.00095	1
53	3.4	3.3	3.5	1.1	0.99	1.21	0.0008	0.00075	0.00085	1
54	2.7	2.55	2.85	1	0.8	1.2	0.00099	0.0009	0.00108	0
55	2.6	2.4	2.8	0.8	0.7	0.9	0.0011	0.00105	0.00115	0
